# Supplementary material for: A Simple and Selective Fluorescent Sensor Chip for Indole-3-Butyric Acid in Mung Bean Sprouts Based on Molecularly Imprinted Polymer Coatings
Source: PubMed Central journal article supplement (PMC5620659; doi:10.3390/s17091954), 2017-08-24
Supplement: sensors-17-01954-s001.pdf [file sensors-17-01954-s001.pdf]

# **A simple and selective fluorescent sensor chip for indole-3-butyric acid in mung bean sprouts based on molecularly imprinted polymer coatings**

**Jiahua Chang <sup>1</sup>, Bota Bahethan <sup>1</sup>, Turghun Muhammad <sup>1,\*</sup>, Burabiye Yakup <sup>1</sup> and Mamatimin Abbas <sup>2</sup>**

<sup>1</sup> College of Chemistry & Chemical Engineering, Xinjiang University, Xinjiang Key laboratory of Oil and Gas Fine Chemicals, Urumqi 830046, People's Republic of China

<sup>2</sup> Université de Bordeaux, CNRS, IMS, UMR 5218, F-33400 Talence, France

\* Corresponding author: *Dr. Turghun Muhammad, College of Chemistry & Chemical Engineering, Xinjiang University, Urumqi 830046, People's Republic of China*  
Tel.: +86 9918582564; Fax.: +86 9918582809; Email: [turghunm@sina.com](mailto:turghunm@sina.com)

**Supporting information**

**Figure S1**

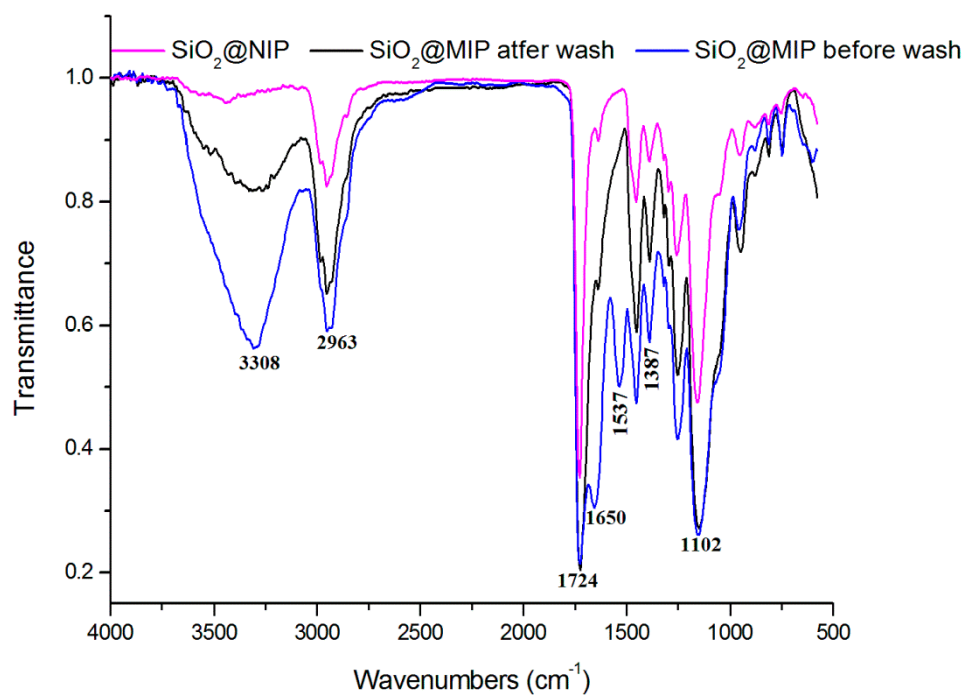

**Figure.S1.** ATR-FTIR spectra of SiO<sub>2</sub>@NIP; SiO<sub>2</sub>@MIP after wash; SiO<sub>2</sub>@MIP before wash

NIP coating, MIP coating before and after wash presented quite similar infrared spectra, as shown in Fig.S1. Before washing, MIP coating showed clear absorbance at 1537  $\text{cm}^{-1}$ , which is attributed to IBA. After washing, the band is disappeared. That is the clear evidence of complete elution of the imprinted molecule from the imprinted sites.

**Figure S2**

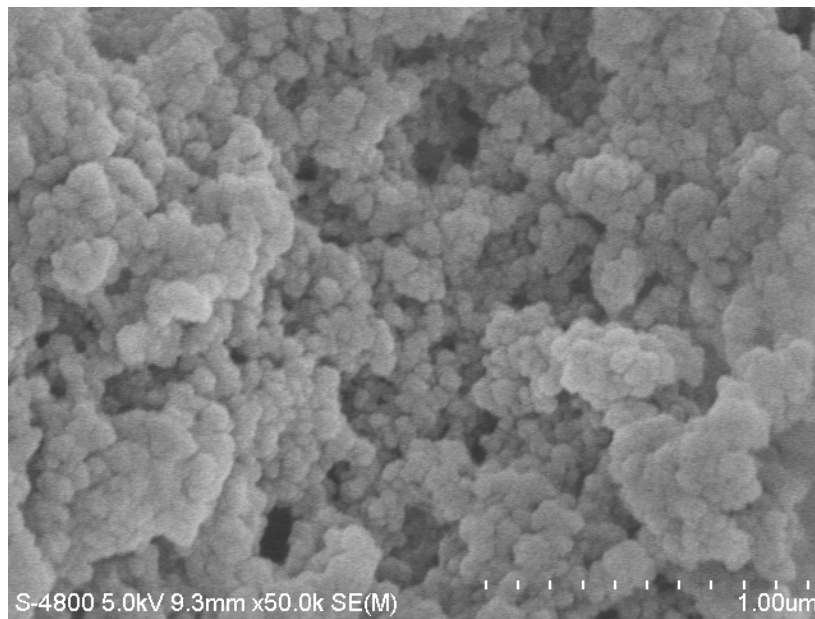

**Fig. S2(a).** Scanning electron microscope image of surface of the MIP coated chip

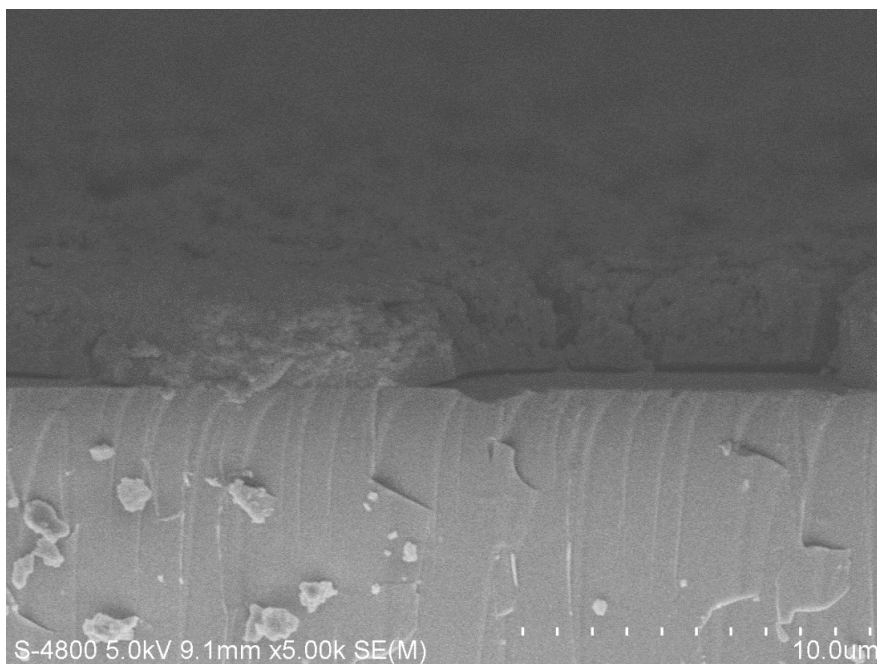

**Fig. S2(b)** Scanning electron microscope image of side of the MIP coated chip cut view

**Figure S3**

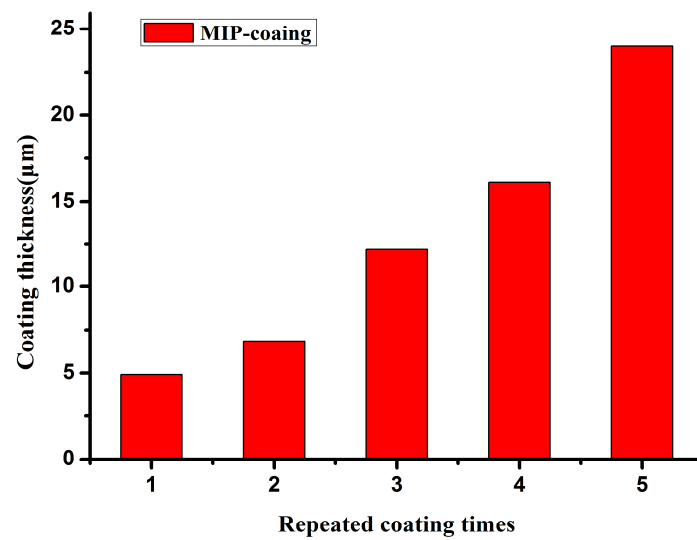

**Fig.S3.** The relationship between times of MIP coating and coating thickness
